# Supplementary material for: Soil and foliar selenium application: Impact on accumulation, speciation, and bioaccessibility of selenium in wheat (Triticum aestivum L.)
Source: Frontiers journal article supplement (doi:10.3389/fpls.2022.988627), 2022-09-14
Supplement: Data_Sheet_1.zip [file Data_Sheet_1.zip]

**Graphical abstract for:**


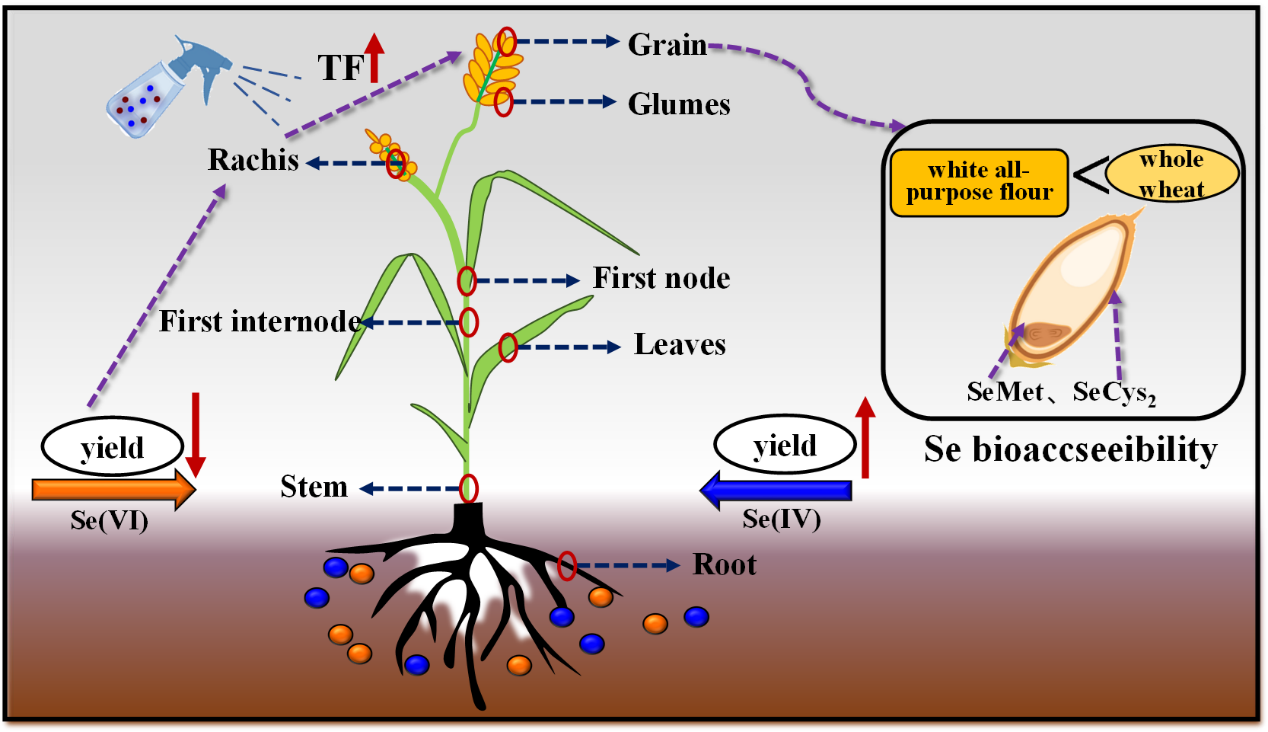
**Soil and foliar selenium application: Impact on accumulation, speciation, and bioaccessibility of selenium in wheat (*Triticum aestivum* L.)**
